# Supplementary material
Source: PubMed Central journal article supplement (PMC2584704)
Supplement: 0804528105_0804528105SI.pdf [file 0804528105_0804528105SI.pdf]

# Supporting Information

Kaspari *et al.* 10.1073/pnas.0804528105

Table S1. Genera using baits across 17 ant communities

| Taxon                   | Peru        |             | BCI   |      | Florida  |        |            | Arkansas |       |          | Oklahoma |     | Costa Rica | Arizona |          |      |            |
|-------------------------|-------------|-------------|-------|------|----------|--------|------------|----------|-------|----------|----------|-----|------------|---------|----------|------|------------|
|                         | ACTS Canopy | ACTS Litter | Cicra | ZRAM | Clearing | Forest | Everglades | Hammock  | Scrub | Hayfield | Oak      | Cut | Ranch      | Lake    | La Selva | SWRS | State-line |
| <b>Dolichoderinae</b>   |             |             |       |      |          |        |            |          |       |          |          |     |            |         |          |      |            |
| <i>Azteca</i>           |             | 1           | 5     | 60   |          |        |            |          |       |          |          |     |            |         |          |      |            |
| <i>Dolichoderus</i>     |             | 2           | 4     | 2    |          |        |            |          |       |          |          |     |            |         |          |      |            |
| <i>Dorymyrmex</i>       |             |             |       |      |          |        |            |          | 1     |          |          |     | 3          |         |          | 24   | 4          |
| <i>Forelius</i>         |             |             |       |      |          |        |            |          |       |          | 1        |     | 6          |         |          | 4    | 16         |
| <i>Linepithema</i>      |             |             |       | 6    | 1        |        |            |          |       |          |          |     | 2          |         |          |      |            |
| <i>Tapinoma</i>         |             |             |       |      | 7        |        | 9          | 5        | 3     |          |          | 4   | 1          |         |          |      |            |
| <b>Ectatominae</b>      |             |             |       |      |          |        |            |          |       |          |          |     |            |         |          |      |            |
| <i>Ectatomma</i>        |             | 7           | 3     | 23   | 7        | 11     |            |          |       |          |          |     |            |         |          | 72   |            |
| <i>Gnamptogenys</i>     |             |             | 8     | 3    |          |        |            |          |       |          |          |     |            |         |          |      |            |
| <b>Formicinae</b>       |             |             |       |      |          |        |            |          |       |          |          |     |            |         |          |      |            |
| <i>Brachymyrmex</i>     |             |             | 7     | 1    |          |        | 1          |          |       | 1        |          |     |            |         |          |      |            |
| <i>Camponotus</i>       | 10          |             | 9     |      |          |        | 1          |          | 13    |          | 1        |     | 4          |         |          |      |            |
| <i>Gigantiops</i>       |             |             | 1     |      |          |        |            |          |       |          |          |     |            |         |          |      |            |
| <i>Lasius</i>           |             |             |       |      |          |        |            |          | 3     |          |          |     |            |         |          |      |            |
| <i>Myrmecocystus</i>    |             |             | 2     |      |          |        |            |          |       |          |          |     |            |         |          |      | 3          |
| <i>Paratrechina</i>     |             | 10          | 16    | 5    | 1        |        | 25         | 26       | 12    | 1        |          | 26  | 30         |         |          | 1    |            |
| <b>Myrmicinae</b>       |             |             |       |      |          |        |            |          |       |          |          |     |            |         |          |      |            |
| <i>Aphaenogaster</i>    |             |             |       |      |          |        | 15         |          | 3     |          | 6        | 1   |            | 1       | 6        |      | 1          |
| <i>Apterostigma</i>     |             |             | 1     |      |          |        |            |          |       |          |          |     |            |         |          |      |            |
| <i>Atta</i>             |             |             | 3     |      |          |        |            |          |       |          |          |     |            |         |          |      |            |
| <i>Blepharidatta</i>    |             |             |       | 3    |          |        |            |          |       |          |          |     |            |         |          |      |            |
| <i>Crematogaster</i>    | 16          | 14          | 130   | 34   | 4        |        |            |          | 3     | 1        |          | 3   | 54         | 26      | 4        | 5    | 2          |
| <i>Cyphomyrmex</i>      |             | 3           |       | 4    |          |        | 1          |          |       |          |          |     |            |         | 2        |      |            |
| <i>Monomorium</i>       |             |             |       |      |          |        | 32         | 15       | 45    | 8        | 110      | 4   | 65         | 47      |          | 16   | 9          |
| <i>Oligomyrmex</i>      |             |             |       |      | 1        |        |            |          |       |          |          |     |            |         |          |      |            |
| <i>Pheidole</i>         |             | 79          | 205   | 144  | 14       | 24     | 64         | 56       | 63    | 1        | 37       | 8   | 8          | 27      | 155      | 8    | 3          |
| <i>Pogonomyrmex</i>     |             |             |       |      |          |        |            |          |       |          |          |     |            |         |          |      | 14         |
| <i>Sericomyrmex</i>     |             |             | 9     |      |          |        |            |          |       |          |          |     |            |         |          |      |            |
| <i>Solenopsis</i>       | 1           | 44          | 31    | 8    | 13       | 2      | 14         |          |       | 147      | 62       | 74  | 4          | 40      | 35       |      | 10         |
| <i>Temnothorax</i>      |             |             |       |      | 8        |        |            |          |       |          |          |     |            | 2       |          |      |            |
| <i>Trachymyrmex</i>     |             | 2           | 14    | 3    |          |        |            |          |       |          |          |     |            |         |          |      |            |
| <i>Wasmannia</i>        |             | 3           | 36    | 15   |          | 5      | 30         | 192      | 4     |          |          |     |            |         |          | 12   |            |
| <b>Ponerinae</b>        |             |             |       |      |          |        |            |          |       |          |          |     |            |         |          |      |            |
| <i>Odontomachus</i>     |             | 1           |       |      |          |        |            |          | 2     |          |          |     |            |         |          | 1    |            |
| <i>Pachycondyla</i>     |             | 2           |       | 2    |          |        |            |          |       |          |          |     |            |         |          | 1    |            |
| <b>Pseudomyrmecinae</b> |             |             |       |      |          |        |            |          |       |          |          |     |            |         |          |      |            |
| <i>Pseudomyrmex</i>     | 1           |             | 1     |      |          |        |            |          | 1     |          |          |     |            |         |          |      |            |

Each cell represents total number of baits hit. Genera are grouped by subfamily.
